# Supplementary material for: Non-Sagittal Knee Joint Kinematics and Kinetics during Gait on Level and Sloped Grounds with Unicompartmental and Total Knee Arthroplasty Patients
Source: PubMed Central journal article supplement (PMC5176302; doi:10.1371/journal.pone.0168566), 2016-12-21
Supplement: pone.0168566.s001.pdf [file pone.0168566.s001.pdf]

**S1 Table. Sagittal plane knee kinematics and kinetics during level walking.**

| Level walking                     |              |             |             |                           |             |       |
|-----------------------------------|--------------|-------------|-------------|---------------------------|-------------|-------|
| Parameter                         | CG           | TKA         | UKA         | p-value                   | Effect size | Power |
| Flexion angle [°]                 | 19.1 ± 4.7   | 15.1 ± 5.5  | 14.0 ± 3.4  | 0.93 <sup>CG-TKA</sup>    | 0.21        | 0.18  |
|                                   |              |             |             | 0.02 <sup>*CG-UKA</sup>   |             |       |
|                                   |              |             |             | 0.84 <sup>TKA-UKA</sup>   |             |       |
| ∅ Flexion velocity [°/s]          | 126.7 ± 27.0 | 88.7 ± 24.5 | 95.7 ± 21.4 | 0.002 <sup>*CG-TKA</sup>  | 0.34        | 0.41  |
|                                   |              |             |             | 0.009 <sup>*CG-UKA</sup>  |             |       |
|                                   |              |             |             | 0.774 <sup>*TKA-UKA</sup> |             |       |
| RoM [°]                           | 17.4 ± 3.5   | 13.4 ± 3.0  | 14.5 ± 2.1  | 0.05 <sup>*CG-TKA</sup>   | 0.27        | 0.27  |
|                                   |              |             |             | 0.046 <sup>*CG-UKA</sup>  |             |       |
|                                   |              |             |             | 0.636 <sup>TKA-UKA</sup>  |             |       |
| Flexion moment [Nm/(kg·m)]        | 0.42 ± 0.1   | 0.31 ± 0.1  | 0.39 ± 0.1  | 0.03 <sup>*CG-TKA</sup>   | 0.2         | 0.16  |
|                                   |              |             |             | 0.8 <sup>CG-UKA</sup>     |             |       |
|                                   |              |             |             | 0.11 <sup>TKA-UKA</sup>   |             |       |
| Flexion mom. impulse [Nms/(kg·m)] | 0.05 ± 0.02  | 0.04 ± 0.01 | 0.05 ± 0.02 | 0.160                     | 0.09        | 0.07  |

\*Indicates significant difference between corresponding groups. Peak values are presented for the first 50% of stance phase. Mean (∅) flexion velocity is calculated from heel strike until maximum knee flexion for the first 50% of stance phase.
