# Supplementary material for: Non-Sagittal Knee Joint Kinematics and Kinetics during Gait on Level and Sloped Grounds with Unicompartmental and Total Knee Arthroplasty Patients
Source: PubMed Central journal article supplement (PMC5176302; doi:10.1371/journal.pone.0168566), 2016-12-21
Supplement: pone.0168566.s002.pdf [file pone.0168566.s002.pdf]

**S2 Table. Sagittal plane knee kinematics and kinetics during decline and incline walking.**

| Parameter                         | Decline walking |              |              |                                                                                  |             |       | Incline walking |              |             |                                                                                 |             |       |
|-----------------------------------|-----------------|--------------|--------------|----------------------------------------------------------------------------------|-------------|-------|-----------------|--------------|-------------|---------------------------------------------------------------------------------|-------------|-------|
|                                   | CG              | TKA          | UKA          | p-value                                                                          | Effect size | Power | CG              | TKA          | UKA         | p-value                                                                         | Effect size | Power |
| Flexion angle [°]                 | 31.8 ± 4.5      | 27.1 ± 4.6   | 25.9 ± 4.1   | 0.039 <sup>*CG-TKA</sup><br>0.006 <sup>*CG-UKA</sup><br>0.785 <sup>TKA-UKA</sup> | 0.27        | 0.27  | 36.8 ± 6.0      | 34.0 ± 5.3   | 33.8 ± 5.8  | 0.371                                                                           | 0.06        | 0.06  |
| ∅ Flexion velocity [°/s]          | 153.8 ± 35.4    | 118.0 ± 30.4 | 116.7 ± 27.8 | 0.029 <sup>*CG-TKA</sup><br>0.016 <sup>*CG-UKA</sup><br>0.984 <sup>TKA-UKA</sup> | 0.25        | 0.24  | 81.4 ± 51.8     | 62.3 ± 44.15 | 72.7 ± 36.3 | 0.398                                                                           | 0.03        | 0.05  |
| RoM [°]                           | 26.1 ± 3.6      | 27.3 ± 8.1   | 29.5 ± 6.7   | 0.405                                                                            | 0.05        | 0.06  | 22.2 ± 4.4      | 23.3 ± 6.4   | 21.7 ± 4.5  | 0.692                                                                           | 0.02        | 0.05  |
| Flexion moment [Nm/(kg·m)]        | 0.69 ± 0.2      | 0.48 ± 0.1   | 0.55 ± 0.1   | 0.005 <sup>*CG-TKA</sup><br>0.063 <sup>*CG-UKA</sup><br>0.534 <sup>TKA-UKA</sup> | 0.27        | 0.27  | 0.52 ± 0.1      | 0.39 ± 0.1   | 0.48 ± 0.1  | 0.037 <sup>*CG-TKA</sup><br>0.733 <sup>CG-UKA</sup><br>0.154 <sup>TKA-UKA</sup> | 0.18        | 0.14  |
| Flexion mom. impulse [Nms/(kg·m)] | 0.11 ± 0.04     | 0.08 ± 0.02  | 0.09 ± 0.02  | 0.209                                                                            | 0.5         | 0.74  | 0.08 ± 0.03     | 0.07 ± 0.03  | 0.09 ± 0.02 | 0.233                                                                           | 0.1         | 0.08  |

\*Indicates significant difference between corresponding groups.

Peak values are presented for the first 50% of stance phase. Mean (∅) flexion velocity is calculated from heel strike until maximum knee flexion for the first 50% of stance phase.
